# Supplementary material for: Map Reading and Analysis with GPT-4V(ision)
Source: MDPI journal article supplement (doi:10.3390/ijgi13040127), 2024-04-11
Supplement: s1 [file s1]

Archive with 1 entries (1 files):
- ijgi-2829302-supplementary.pdf
